# Supplementary material for: Modular microfluidic valve structures based on reversible thermoresponsive ionogel actuators
Source: Royal Society of Chemistry journal article supplement (doi:10.1039/c4lc00568f), 2014-01-01
Supplement: c4lc00568f1.pdf [file c4lc00568f1.pdf]

## ESI

### Modular microfluidic valve structures based on reversible thermoresponsive ionogel actuators

Fernando Benito-Lopez,<sup>\*a,c</sup> Marta Antoñana-Díez,<sup>a,b</sup> Vincenzo F. Curto,<sup>c</sup> Dermot Diamond,<sup>c</sup> Vanessa Castro-López<sup>\*a</sup>

<sup>a</sup>CIC microGUNE, Arrasate-Mondragón, SPAIN, <sup>b</sup>IK4-IKERLAN, Arrasate-Mondragón, SPAIN, <sup>c</sup>Insight: Centre for Data Analytics, National Centre for Sensor Research, Dublin City University, Dublin 9, IRELAND.

*\*both authors contributed equally to this work.*

Received (in XXX, XXX) Xth XXXXXXXXXX 20XX, Accepted Xth XXXXXXXXXX 20XX

DOI: 10.1039/b000000x

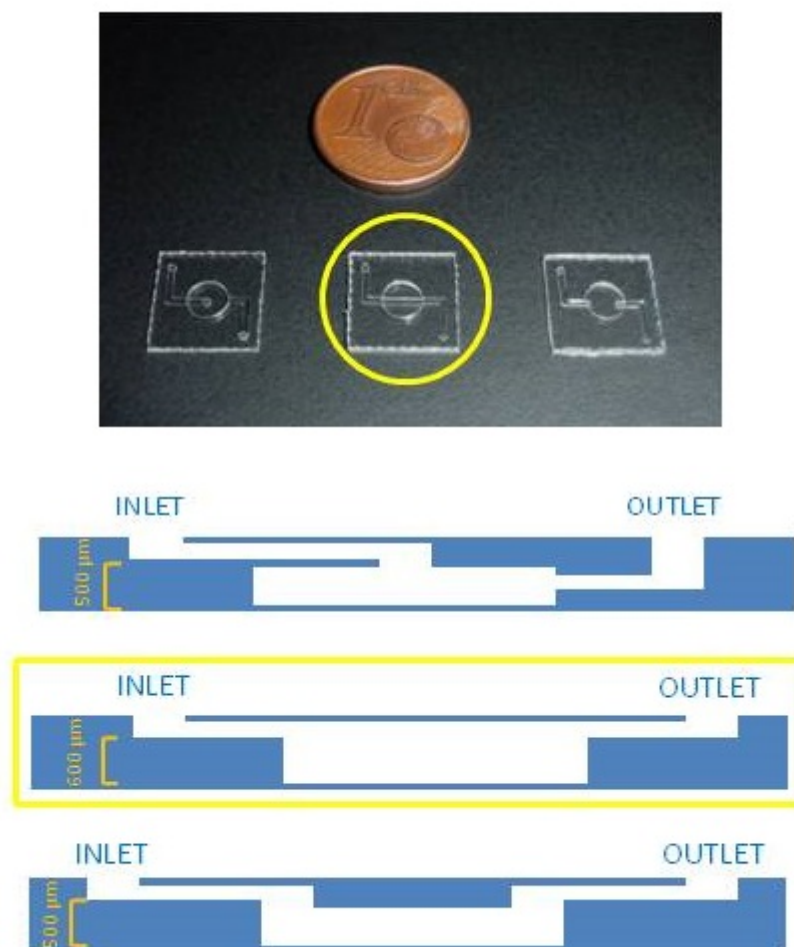

**Figure ESI-1:** Picture of the three valves used in this manuscript and respective cross sections; a) Volume = 6  $\mu\text{L}$  b) Volume = 7  $\mu\text{L}$  c) volume = 6  $\mu\text{L}$ . In yellow the valve used for valve characterisation.

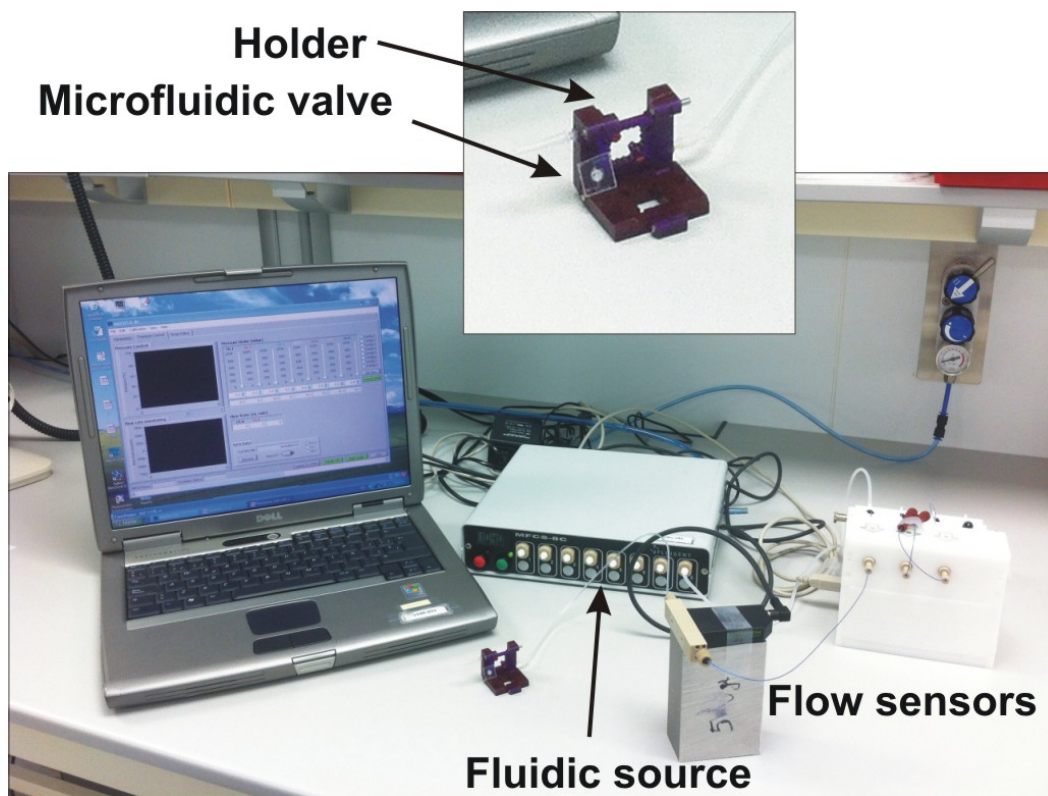

**Figure ESI-2:** Experimental set-up for the characterisation of the valve.

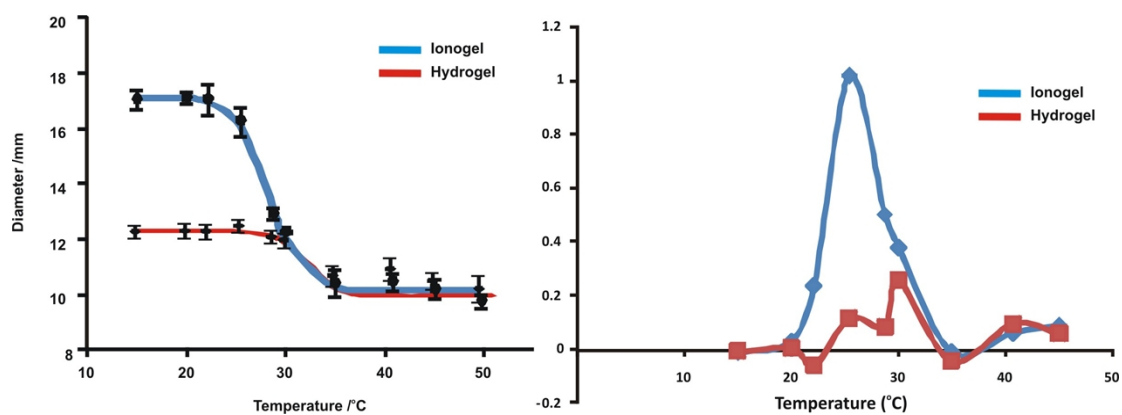

**Figure ESI-3:** Size (diameter) changes *versus* temperature of both pNIPAAm ionogel and hydrogel discs for LCST transition calculations (left), and average LCST comparison (right).

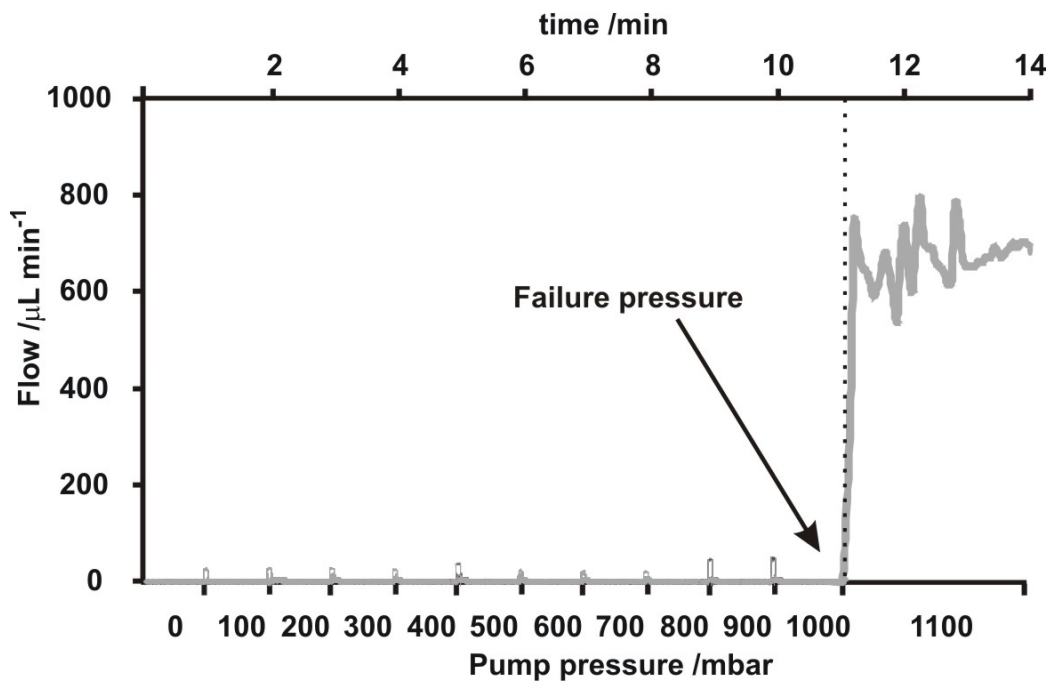

**Figure ESI-4:** Failure pressure value determination for a modular microfluidic device ionogel valve.

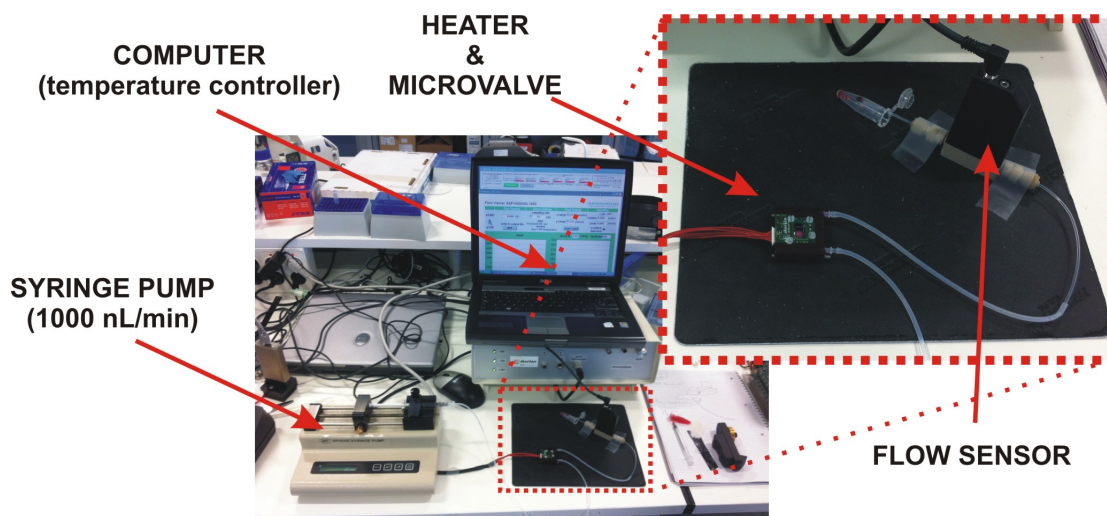

**Figure ESI-5:** Thermo-actuated experimental set-up for the module microfluidic device incorporating an ionogel valve.

**Table ESI-1:** FTIR signals of the hydrogel, ionogel and the ionic liquid.

| Assignment                       | Poly(NIPAAm) | EMIES | Ionogel   | Ref.     |
|----------------------------------|--------------|-------|-----------|----------|
| N-H (stretch)                    | 3293         |       | 3306      | [1], [2] |
| C45-H (stretch)                  |              | 3155  | 3157      | [3]      |
| C2-H (stretch)                   |              | 3108  | 3110      | [3]      |
| C=O (stretch - Amide I)          | 1640         |       | 1646      | [1], [2] |
| C=N (stretch)                    |              | 1574  | 1570 (sh) | [3]      |
| N-H (in plane bending -Amide II) | 1539         |       | 1543      | [1], [2] |
| C-CH <sub>3</sub> (sym. bending) | 1388         |       | 1392      | [1], [2] |
| C-CH <sub>3</sub> (sym. bending) | 1368         |       | 1368      | [1], [2] |
| SO <sub>3</sub> (asym. stretch)  |              | 1217  | 1219      | [3]      |
| SO <sub>3</sub> (sym. stretch)   |              | 1015  | 1018      | [3]      |

sh – shoulder

- [1] Q.-S. Zhang, L.-S. Zha, J.-H. Ma, B.-R. Liang, *Journal of Applied Polymer Science* **2007**, *103*, 2962-2967.
- [2] B. Ziółkowski, L. Florea, J. Theobald, F. Benito-Lopez, D. Diamond, *Soft Matter* **2013**, *9*, 8754-8760.
- [3] Q.-G. Zhang, N.-N. Wang, Z.-W. Yu, *Journal of Physical Chemistry B* **2010**, *114*, 4747-4754.
